# Supplementary material
Source: PubMed Central journal article supplement (PMC4901879)
Supplement: supp_dew080_dew080supp_table1.pdf [file supp_dew080_dew080supp_table1.pdf]

**Supplementary Table S1** Primer sequences used in this study.

| Gene symbol   | Gene Bank ID | Primer sequence                                                  |
|---------------|--------------|------------------------------------------------------------------|
| <i>RPL17</i>  | NM_000985    | F: 5'-ACGAAAAGCCACGAAGTATCTG-3'<br>R: 5'-GACCTTGTGTCCAGCCCCAT-3' |
| <i>ESR1</i>   | NM_017617    | F: 5'-GCCCTGGAGACCACAAATCA-3'<br>R: 5'-AGGCAATGGCGAAAAGAAAC-3'   |
| <i>PGR</i>    | NM_000926    | F: 5'-TGTATTTGTGCGTGTGGGTG-3'<br>R: 5'-TACAGCCCATTCCCAGGAAG-3'   |
| <i>C3</i>     | NM_000064    | F: 5'-AACTACATCACAGAGCTGCG-3'<br>R: 5'-AAGTCCTCAACGTTCCACAG-3'   |
| <i>NOTCH1</i> | NM_017617    | F: 5'-TGGTGGTGGTGGTGTCTGAT-3'<br>R: 5'-CGGTTGTCAATCTCCAGGTAGA-3' |
