# Supplementary material
Source: PubMed Central journal article supplement (PMC4901879)
Supplement: supp_dew080_dew080supp_table2.pdf [file supp_dew080_dew080supp_table2.pdf]

**Supplementary Table SII ERA gene list and fold changes.**

| Gene ID | Fold change  | P-value      | Adjusted P-value |
|---------|--------------|--------------|------------------|
| ACTA2   | 1.980797977  | 0.026934306* | 0.995859766      |
| GOS2    | 2.635005388  | 0.061839887  | 0.995859766      |
| LRP4    | 1.272317391  | 0.065733523  | 0.995859766      |
| SI00P   | -6.613665394 | 0.071451472  | 0.995859766      |
| EFEMPI  | -1.619882615 | 0.074847322  | 0.995859766      |
| TTC21B  | 1.396709266  | 0.113156303  | 0.995859766      |
| MFAP5   | -1.566770441 | 0.125679492  | 0.995859766      |
| SPDEF   | 1.544181484  | 0.178281668  | 0.995859766      |
| TMEM16A | 1.525564471  | 0.181708897  | 0.995859766      |
| CYP2J2  | 2.428695519  | 0.187907699  | 0.995859766      |
| ADRA2A  | 1.46137882   | 0.195713174  | 0.995859766      |
| TAGLN   | 1.593939267  | 0.195934709  | 0.995859766      |
| PSMB10  | -1.333560929 | 0.219075159  | 0.995859766      |
| AMIGO2  | -1.332736612 | 0.223260992  | 0.995859766      |
| SLPI    | -1.284047794 | 0.227099735  | 0.995859766      |
| ECMI    | 1.308260482  | 0.228457049  | 0.995859766      |
| HMHA1   | -1.324092064 | 0.229145736  | 0.995859766      |
| TSPAN8  | -1.609930361 | 0.233472938  | 0.995859766      |
| SLC15A1 | 1.459554275  | 0.240146716  | 0.995859766      |
| TRA@    | -1.184178114 | 0.248122149  | 0.995859766      |
| ANXA4   | -1.405254349 | 0.254781677  | 0.995859766      |
| KMO     | 1.311588636  | 0.259416296  | 0.995859766      |
| POLD4   | -1.167917566 | 0.260814524  | 0.995859766      |
| OLFM4   | 1.80177224   | 0.26330907   | 0.995859766      |
| PRKCQ   | 1.194066117  | 0.26825733   | 0.995859766      |
| GALNT12 | 1.256236355  | 0.271005503  | 0.995859766      |
| OPRK1   | 1.81352553   | 0.286245873  | 0.995859766      |
| ARID5B  | -1.427399508 | 0.290472443  | 0.995859766      |
| RASSF2  | 1.326185031  | 0.294441757  | 0.995859766      |
| FGB     | -1.393271996 | 0.298172755  | 0.995859766      |
| DEFB1   | -1.316032969 | 0.29863283   | 0.995859766      |
| SOD2    | -1.689005072 | 0.301973188  | 0.995859766      |
| COMP    | -1.4996141   | 0.30526339   | 0.995859766      |
| FAM59A  | -1.222919998 | 0.319029936  | 0.995859766      |
| MAOA    | -1.390965157 | 0.321926178  | 0.995859766      |
| PBK     | -1.433570172 | 0.322326461  | 0.995859766      |
| SCGB2A2 | -1.552731563 | 0.322822385  | 0.995859766      |
| KCNJ2   | 1.497628434  | 0.323287338  | 0.995859766      |
| C3      | -1.595440547 | 0.326872546  | 0.995859766      |
| LEPREL1 | -1.431893342 | 0.328914922  | 0.995859766      |
| POSTN   | 1.197501152  | 0.330878137  | 0.995859766      |
| CLDN4   | -1.308927587 | 0.332025902  | 0.995859766      |
| SLC15A2 | 1.465573832  | 0.337587487  | 0.995859766      |
| PROM1   | -1.141388761 | 0.339073883  | 0.995859766      |
| NNMT    | -1.79636584  | 0.339804725  | 0.995859766      |
| MRPS2   | -1.236724672 | 0.340094981  | 0.995859766      |

Continued

**Supplementary Table SII Continued**

| Gene ID   | Fold change  | P-value     | Adjusted P-value |
|-----------|--------------|-------------|------------------|
| HPSE      | -1.677438737 | 0.342345462 | 0.995859766      |
| SERPING1  | -1.315031232 | 0.355480244 | 0.995859766      |
| CTNNA2    | 1.597464338  | 0.357090249 | 0.995859766      |
| ATP1B1    | 1.514531866  | 0.358875669 | 0.995859766      |
| C14orf161 | -1.365122431 | 0.370606241 | 0.995859766      |
| CLDN10    | -1.397860727 | 0.373726464 | 0.995859766      |
| IL15      | -1.319372678 | 0.373816655 | 0.995859766      |
| GREM2     | 1.435000049  | 0.377968174 | 0.995859766      |
| EMCN      | -1.120392664 | 0.379161445 | 0.995859766      |
| SYNE2     | -1.331690043 | 0.381419351 | 0.995859766      |
| STAR      | -1.453842531 | 0.382000576 | 0.995859766      |
| GBP2      | -1.324534585 | 0.382311317 | 0.995859766      |
| SLC16A6   | 1.345562254  | 0.38401677  | 0.995859766      |
| PROS1     | -1.210395425 | 0.385208053 | 0.995859766      |
| C10orf10  | -1.788916525 | 0.386372221 | 0.995859766      |
| MGC11242  | 1.613126591  | 0.390768664 | 0.995859766      |
| MT2A      | -1.128324787 | 0.391476298 | 0.995859766      |
| CFD       | -1.128053566 | 0.391971786 | 0.995859766      |
| CKB       | 1.215555502  | 0.393304888 | 0.995859766      |
| IGF2      | -1.167887544 | 0.398745168 | 0.995859766      |
| DEPDC6    | 1.147276286  | 0.40301268  | 0.995859766      |
| DUOX1     | 1.624900028  | 0.40330445  | 0.995859766      |
| SERPINA5  | 1.729431685  | 0.406121485 | 0.995859766      |
| COBL      | 1.223592936  | 0.415286581 | 0.995859766      |
| FOSL2     | -1.212990638 | 0.421680036 | 0.995859766      |
| GABARAPL1 | -1.229595302 | 0.423866795 | 0.995859766      |
| MSX1      | 1.51008813   | 0.430888412 | 0.995859766      |
| ABCC3     | -1.328367058 | 0.432835343 | 0.995859766      |
| GPRC5C    | -1.16621975  | 0.433189035 | 0.995859766      |
| HEY2      | 1.197034076  | 0.433598508 | 0.995859766      |
| CSRP2     | 1.513300175  | 0.435278601 | 0.995859766      |
| RAD54B    | 1.271596943  | 0.435490193 | 0.995859766      |
| ANG       | -1.371220169 | 0.438224961 | 0.995859766      |
| CCNB2     | -1.234780267 | 0.438500585 | 0.995859766      |
| AGR2      | -1.314061852 | 0.450891331 | 0.995859766      |
| TIMP3     | -1.176553285 | 0.451723959 | 0.995859766      |
| MMP26     | 1.465117076  | 0.456036921 | 0.995859766      |
| SLC7A1    | 1.561377512  | 0.460086607 | 0.995859766      |
| CDC20     | 1.326277218  | 0.461333075 | 0.995859766      |
| RANBP17   | 1.270502341  | 0.46524398  | 0.995859766      |
| PENK      | -1.177383195 | 0.473366124 | 0.995859766      |
| EFNA1     | -1.279842911 | 0.476208086 | 0.995859766      |
| MUC16     | 1.198931337  | 0.4772511   | 0.995859766      |
| FXRD2     | -1.086541885 | 0.477985382 | 0.995859766      |
| AQP3      | -1.430681951 | 0.478041147 | 0.995859766      |
| KIAA0888  | 1.123734409  | 0.47902325  | 0.995859766      |
| GZMA      | -1.252916257 | 0.483913778 | 0.995859766      |

Continued

Supplementary Table SII *Continued*

| Gene ID  | Fold change  | P-value     | Adjusted P-value |
|----------|--------------|-------------|------------------|
| GAST     | -1.785829938 | 0.484271917 | 0.995859766      |
| ADAMTS1  | -1.12130018  | 0.487836761 | 0.995859766      |
| KCNG1    | 1.529531393  | 0.492623132 | 0.995859766      |
| C4.4A    | -1.424448784 | 0.494634674 | 0.995859766      |
| LRRC17   | 1.222759286  | 0.500750223 | 0.995859766      |
| CXCL13   | -1.210034891 | 0.503406034 | 0.995859766      |
| CXCL14   | -1.961961983 | 0.503761042 | 0.995859766      |
| NR4A2    | 1.500515368  | 0.503912789 | 0.995859766      |
| GADD45A  | -1.305123538 | 0.509688009 | 0.995859766      |
| IDH1     | 1.339579938  | 0.514710731 | 0.995859766      |
| EDNRB    | -1.186552697 | 0.515337895 | 0.995859766      |
| SNX10    | -1.384859625 | 0.516437833 | 0.995859766      |
| PECI     | 1.321358465  | 0.516692137 | 0.995859766      |
| NP       | -1.12817081  | 0.518018653 | 0.995859766      |
| C11orf8  | 1.259306905  | 0.51805248  | 0.995859766      |
| ID4      | -1.1579709   | 0.518058771 | 0.995859766      |
| KHDRBS3  | 1.30660998   | 0.518192595 | 0.995859766      |
| DDX52    | -1.254441987 | 0.520001765 | 0.995859766      |
| BUB1B    | 1.078550425  | 0.525536156 | 0.995859766      |
| HSD11B2  | 1.431541454  | 0.529381854 | 0.995859766      |
| GAS1     | -1.342873584 | 0.530629315 | 0.995859766      |
| CREB3LI  | 1.337771168  | 0.53163387  | 0.995859766      |
| PRCI     | 1.110655344  | 0.53569374  | 0.995859766      |
| CORO1A   | -1.179978816 | 0.536569035 | 0.995859766      |
| CP       | -1.461859067 | 0.539679508 | 0.995859766      |
| LAMB3    | -1.420128211 | 0.539780685 | 0.995859766      |
| C4BPA    | -1.597907236 | 0.54051875  | 0.995859766      |
| OFD1     | 1.202089343  | 0.549467254 | 0.995859766      |
| CRABP2   | 1.171164162  | 0.551165672 | 0.995859766      |
| SI00A4   | -1.202757229 | 0.552215445 | 0.995859766      |
| SLC38A1  | -1.168856034 | 0.554199979 | 0.995859766      |
| HAL      | -1.105548963 | 0.557247513 | 0.995859766      |
| PAEP     | -1.833030247 | 0.560035026 | 0.995859766      |
| SLC1A1   | -1.325311142 | 0.565467728 | 0.995859766      |
| CDC2     | 1.117008868  | 0.577824555 | 0.995859766      |
| ARHGDI B | -1.15662599  | 0.578227366 | 0.995859766      |
| LRRC1    | 1.216941425  | 0.580432001 | 0.995859766      |
| SOX17    | 1.227820074  | 0.582261352 | 0.995859766      |
| HLA-DOB  | 1.353139919  | 0.584379915 | 0.995859766      |
| SORD     | 1.522280452  | 0.585527087 | 0.995859766      |
| NDRG2    | 1.332212429  | 0.592574436 | 0.995859766      |
| XCL1     | -1.126731873 | 0.594676723 | 0.995859766      |
| GPX3     | -1.412569322 | 0.604030682 | 0.995859766      |
| LMOD1    | -1.105435213 | 0.607091346 | 0.995859766      |
| DFNB31   | 1.255834203  | 0.607642706 | 0.995859766      |
| DPP4     | -1.091406759 | 0.611976184 | 0.995859766      |
| C10orf3  | -1.083877369 | 0.621740989 | 0.995859766      |

*Continued*Supplementary Table SII *Continued*

| Gene ID  | Fold change  | P-value     | Adjusted P-value |
|----------|--------------|-------------|------------------|
| SCYE1    | -1.108398222 | 0.632528165 | 0.995859766      |
| GALNT4   | 1.176478395  | 0.6341705   | 0.995859766      |
| RNASE4   | -1.127818923 | 0.641949127 | 0.995859766      |
| ATP6V0E2 | 1.174211533  | 0.648869478 | 0.995859766      |
| MYL9     | 1.119188708  | 0.653726354 | 0.995859766      |
| KIF20A   | 1.080588396  | 0.654357833 | 0.995859766      |
| TRH      | 1.098079618  | 0.659134204 | 0.995859766      |
| IMPA2    | -1.179100461 | 0.659664555 | 0.995859766      |
| VCAM1    | 1.059136629  | 0.662016298 | 0.995859766      |
| PAQR4    | 1.091787632  | 0.662912166 | 0.995859766      |
| KIF4A    | -1.056280401 | 0.66428739  | 0.995859766      |
| ABLIM3   | -1.086269923 | 0.665944765 | 0.995859766      |
| LMCD1    | -1.186350856 | 0.672218755 | 0.995859766      |
| COL16A1  | -1.196123472 | 0.673962813 | 0.995859766      |
| EPHB3    | 1.17926332   | 0.679096472 | 0.995859766      |
| RRAS     | -1.075590157 | 0.682470121 | 0.995859766      |
| CENPE    | 1.048417711  | 0.684478336 | 0.995859766      |
| PTPRR    | 1.198734795  | 0.684642815 | 0.995859766      |
| STEAP4   | 1.116712075  | 0.687852866 | 0.995859766      |
| ARG2     | -1.127222733 | 0.688391248 | 0.995859766      |
| BCL6     | -1.101847991 | 0.690228402 | 0.995859766      |
| IGFBP1   | -1.121134778 | 0.690758518 | 0.995859766      |
| FLJ10719 | -1.047768249 | 0.691199956 | 0.995859766      |
| MFAP2    | -1.103564251 | 0.692444942 | 0.995859766      |
| CBR3     | 1.263098147  | 0.701090559 | 0.995859766      |
| CDA      | -1.231846989 | 0.702751855 | 0.995859766      |
| TOP2A    | 1.057040403  | 0.710314377 | 0.995859766      |
| ASS1     | -1.143049586 | 0.711515284 | 0.995859766      |
| ACADSB   | -1.065265783 | 0.712171732 | 0.995859766      |
| GPR64    | 1.104242757  | 0.72391749  | 0.995859766      |
| CTSW     | -1.083981772 | 0.727480274 | 0.995859766      |
| TMEPAI   | -1.065524037 | 0.727814133 | 0.995859766      |
| HEY1     | -1.1342611   | 0.736515865 | 0.995859766      |
| HPGD     | 1.112973248  | 0.748080936 | 0.995859766      |
| THBS2    | 1.155880308  | 0.74823391  | 0.995859766      |
| SPP1     | 1.122552446  | 0.750326774 | 0.995859766      |
| DKK1     | -1.099464065 | 0.756562744 | 0.995859766      |
| MTIG     | 1.03602187   | 0.759207225 | 0.995859766      |
| HRASLS3  | 1.112362227  | 0.759962961 | 0.995859766      |
| DHRS3    | -1.128144657 | 0.762276243 | 0.995859766      |
| XCL2     | -1.089459869 | 0.772779168 | 0.995859766      |
| MAP2K6   | 1.225570647  | 0.77415907  | 0.995859766      |
| TMSL8    | 1.034715311  | 0.775383288 | 0.995859766      |
| TACC3    | 1.038245383  | 0.791908607 | 0.995859766      |
| ATP6V1A  | -1.041638516 | 0.793567178 | 0.995859766      |
| NRG2     | 1.034517007  | 0.794315732 | 0.995859766      |
| CES1     | -1.039300491 | 0.79497817  | 0.995859766      |

*Continued*

Supplementary Table SII *Continued*

| Gene ID  | Fold change  | P-value     | Adjusted P-value |
|----------|--------------|-------------|------------------|
| BIRC3    | 1.098032019  | 0.795488733 | 0.995859766      |
| INDO     | -1.074779599 | 0.809205758 | 0.995859766      |
| CLU      | -1.109903166 | 0.817989155 | 0.995859766      |
| COTLI    | -1.067240363 | 0.819976742 | 0.995859766      |
| ALPL     | 1.111369522  | 0.820689315 | 0.995859766      |
| BARD1    | 1.07380778   | 0.821947075 | 0.995859766      |
| GDF15    | 1.070556241  | 0.831116923 | 0.995859766      |
| NKG7     | -1.052290948 | 0.834916528 | 0.995859766      |
| TH       | -1.05829763  | 0.837725126 | 0.995859766      |
| CRISP3   | 1.051511613  | 0.838095056 | 0.995859766      |
| TBC1D2   | -1.025825077 | 0.847235686 | 0.995859766      |
| MT1H     | -1.029818093 | 0.847412903 | 0.995859766      |
| CYP3A5   | -1.036119056 | 0.848964196 | 0.995859766      |
| FLJ20152 | 1.041023068  | 0.855179807 | 0.995859766      |
| TCN1     | 1.057878584  | 0.863103322 | 0.995859766      |
| PTGER2   | -1.038640244 | 0.86328243  | 0.995859766      |
| HABP2    | -1.068475458 | 0.868579312 | 0.995859766      |
| GNLY     | -1.050808481 | 0.871098579 | 0.995859766      |
| RARRES1  | -1.06604636  | 0.871855245 | 0.995859766      |
| CAPN6    | 1.086986055  | 0.880744151 | 0.995859766      |
| CD7      | 1.021200915  | 0.899489499 | 0.995859766      |
| OLFM1    | 1.014229158  | 0.900941821 | 0.995859766      |
| LRFN4    | -1.018422513 | 0.902161205 | 0.995859766      |
| KLRC1    | -1.029945732 | 0.902298372 | 0.995859766      |
| EDN3     | 1.018669215  | 0.90246682  | 0.995859766      |
| SFRP4    | -1.050855654 | 0.902982254 | 0.995859766      |
| DLG7     | 1.018685052  | 0.903801308 | 0.995859766      |
| PPARGCIA | -1.016314205 | 0.906201491 | 0.995859766      |
| GLIPRI   | 1.037602167  | 0.907531112 | 0.995859766      |
| RARRES3  | -1.03257503  | 0.911846297 | 0.995859766      |
| THBD     | -1.06135801  | 0.921286015 | 0.995859766      |
| CYBRD1   | -1.018126697 | 0.921424498 | 0.995859766      |
| AOX1     | -1.027134049 | 0.921480199 | 0.995859766      |
| EVC      | 1.011659447  | 0.926511383 | 0.996420191      |
| ANK3     | 1.046319376  | 0.935227973 | 0.996420191      |
| KCNK7    | 1.014079109  | 0.936587222 | 0.996420191      |
| HAND2    | 1.02233015   | 0.941875971 | 0.996420191      |
| SI00A1   | 1.014928956  | 0.944695767 | 0.996420191      |
| ADAMTS8  | -1.019401697 | 0.951129929 | 0.996420191      |
| IL2RB    | -1.011999695 | 0.952802076 | 0.996420191      |
| RPRM     | -1.022120872 | 0.956106286 | 0.996420191      |
| KIF11    | 1.004219895  | 0.9750218   | 0.996420191      |
| ENPEP    | -1.005850116 | 0.983230366 | 0.996420191      |
| KIAA0802 | -1.004108168 | 0.983383658 | 0.996420191      |
| IER3     | -1.004729517 | 0.986350635 | 0.996420191      |
| ASPM     | -1.002182681 | 0.986519196 | 0.996420191      |
| LIF      | -1.002838613 | 0.987688174 | 0.996420191      |

*Continued*Supplementary Table SII *Continued*

| Gene ID | Fold change  | P-value     | Adjusted P-value |
|---------|--------------|-------------|------------------|
| KRT7    | 1.003804908  | 0.987847311 | 0.996420191      |
| KNTC2   | 1.002262102  | 0.988151144 | 0.996420191      |
| CALB2   | -1.000386284 | 0.997638016 | 0.999318848      |
| PLA1A   | 1.000097266  | 0.999318848 | 0.999318848      |

\*P &lt; 0.05
