# Supplementary material
Source: PubMed Central journal article supplement (PMC4901879)

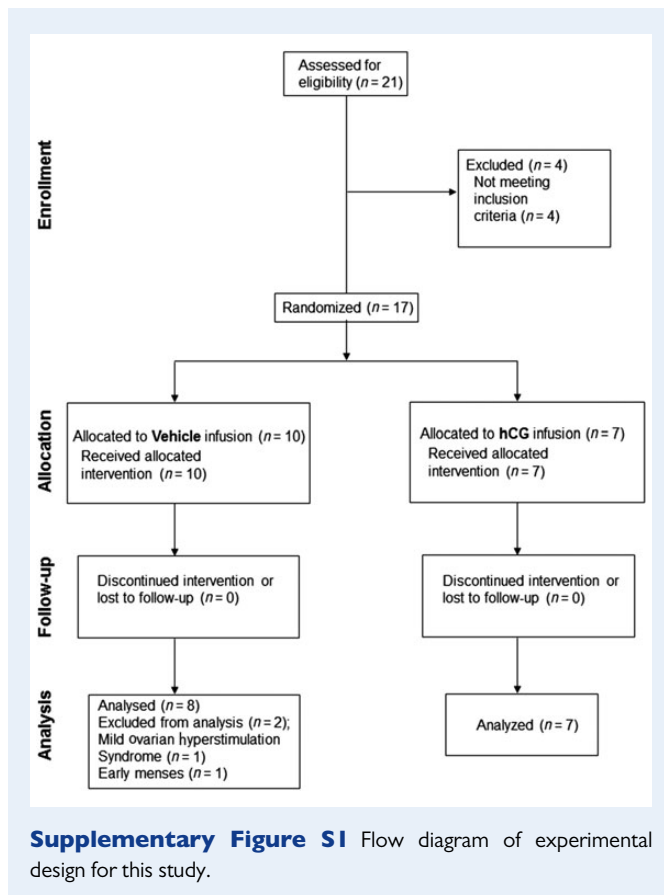

Supplement: supp_dew080_dew080supp_fig1.pdf [file supp_dew080_dew080supp_fig1.pdf]
